# Supplementary material for: SPECTRUM – A MATLAB Toolbox for Proteoform Identification from Top-Down Proteomics Data
Source: Sci Rep. 2019 Aug 2;9:11267. doi: 10.1038/s41598-019-47724-1 (PMC6677810; doi:10.1038/s41598-019-47724-1)
Supplement: Supplementary file 18 — Supplementary Table S12 - Parameter Sensitivity Analysis [file 41598_2019_47724_MOESM18_ESM.xlsx]

## Sheet: Parameter Senstivity Analysis
	Parameter Senstivity Analysis		SPECTRUM Search Parameters 1
	Sr. #	File Information True Protein: P62805 (Histone H4)	PST Tolerance = 0.1 Da, PST Length = 3 to 6, In silico Tolerance = 15 ppm
			MW Tolerance = 250 Da		MW Tolerance = 500 Da		MW Tolerance = 1000 Da		MW Tolerance = 2000 Da
	1	HELA_pk13_sw1_66sc_mono	1		1		1		1
	2	HELA_pk17_sw1_140sc_mono	1		1		1		1
	3	HELA_pk18_sw1_160sc_mono	1		1		1		1
	4	HELA_pk18_sw2_160sc_mono	1		1		1		1
	5	HELA_pk19_sw1_210sc_mono	1		1		1		1
	6	HELA_pk19_sw2_255sc_mono	‡		‡		‡		‡
	7	HELA_pk19_sw3.1_147sc_mono	1		1		1		1
	8	HELA_pk20_sw1_205sc_mono	N/A		N/A		N/A		N/A
	9	HELA_pk20_sw2_202sc_mono	N/A		N/A		N/A		N/A
	10	HELA_pk20_sw3_215sc_mono	1		1		1		1
	Parameter Senstivity Analysis		SPECTRUM Search Parameters 2
	Sr. #	File Information True Protein: P62805 (Histone H4)	PST Tolerance = 0.1 Da, PST Length = 4 to 6, In silico Tolerance = 15 ppm
			MW Tolerance = 250 Da		MW Tolerance = 500 Da		MW Tolerance = 1000 Da		MW Tolerance = 2000 Da
	1	HELA_pk13_sw1_66sc_mono	N/A		N/A		N/A		N/A
	2	HELA_pk17_sw1_140sc_mono	1		1		1		1
	3	HELA_pk18_sw1_160sc_mono	N/A		‡		‡		‡
	4	HELA_pk18_sw2_160sc_mono	1		1		1		1
	5	HELA_pk19_sw1_210sc_mono	N/A		N/A		‡		‡
	6	HELA_pk19_sw2_255sc_mono	N/A		N/A		N/A		N/A
	7	HELA_pk19_sw3.1_147sc_mono	N/A		N/A		N/A		N/A
	8	HELA_pk20_sw1_205sc_mono	N/A		N/A		N/A		N/A
	9	HELA_pk20_sw2_202sc_mono	N/A		N/A		N/A		N/A
	10	HELA_pk20_sw3_215sc_mono	1		1		1		1
	Parameter Senstivity Analysis		SPECTRUM Search Parameters 3
	Sr. #	File Information True Protein: P62805 (Histone H4)	PST Tolerance = 0.1 Da, PST Length = 3 to 6, In silico Tolerance = 25 ppm
			MW Tolerance = 250 Da		MW Tolerance = 500 Da		MW Tolerance = 1000 Da		MW Tolerance = 2000 Da
	1	HELA_pk13_sw1_66sc_mono	1		1		1		1
	2	HELA_pk17_sw1_140sc_mono	1		1		1		1
	3	HELA_pk18_sw1_160sc_mono	1		1		1		1
	4	HELA_pk18_sw2_160sc_mono	1		1		1		1
	5	HELA_pk19_sw1_210sc_mono	1		1		1		1
	6	HELA_pk19_sw2_255sc_mono	‡		‡		‡		‡
	7	HELA_pk19_sw3.1_147sc_mono	1		1		1		1
	8	HELA_pk20_sw1_205sc_mono	N/A		N/A		N/A		N/A
	9	HELA_pk20_sw2_202sc_mono	N/A		N/A		N/A		N/A
	10	HELA_pk20_sw3_215sc_mono	1		1		1		1
	Parameter Senstivity Analysis		SPECTRUM Search Parameters 4
	Sr. #	File Information True Protein: P62805 (Histone H4)	PST Tolerance = 0.1 Da, PST Length = 4 to 6, In silico Tolerance = 25 ppm
			MW Tolerance = 250 Da		MW Tolerance = 500 Da		MW Tolerance = 1000 Da		MW Tolerance = 2000 Da
	1	HELA_pk13_sw1_66sc_mono	N/A		N/A		N/A		N/A
	2	HELA_pk17_sw1_140sc_mono	1		1		1		1
	3	HELA_pk18_sw1_160sc_mono	N/A		‡		‡		‡
	4	HELA_pk18_sw2_160sc_mono	1		1		1		1
	5	HELA_pk19_sw1_210sc_mono	N/A		N/A		‡		‡
	6	HELA_pk19_sw2_255sc_mono	N/A		N/A		N/A		N/A
	7	HELA_pk19_sw3.1_147sc_mono	N/A		N/A		N/A		N/A
	8	HELA_pk20_sw1_205sc_mono	N/A		N/A		N/A		N/A
	9	HELA_pk20_sw2_202sc_mono	N/A		N/A		N/A		N/A
	10	HELA_pk20_sw3_215sc_mono	1		1		1		1
	N/A : Not applicable as no protein was found for these searches								PST : Peptide Sequence Tag
	‡ : True protein not found/ True Protein Not Top Identification								MW : Molecular Weight

## Sheet: Parameter Senstivity Analys (2)
	Parameter Senstivity Analysis
	SPECTRUM Search Parameters 1			PST Length = 3 to 6, In silico Tolerance = 15 ppm
		Sr. #	File Information	MW Tolerance = 250 Da		MW Tolerance = 500 Da		MW Tolerance = 1000 Da		MW Tolerance = 2000 Da
		1	HELA_pk13_sw1_66sc_mono	1		1		1		1
		2	HELA_pk17_sw1_140sc_mono	1		1		1		1
		3	HELA_pk18_sw1_160sc_mono	1		1		1		1
		4	HELA_pk18_sw2_160sc_mono	1		1		1		1
		5	HELA_pk19_sw1_210sc_mono	1		1		1		1
		6	HELA_pk19_sw2_255sc_mono	‡		‡		‡		‡
		7	HELA_pk19_sw3.1_147sc_mono	1		1		1		1
		8	HELA_pk20_sw1_205sc_mono	N/A		N/A		N/A		N/A
		9	HELA_pk20_sw2_202sc_mono	N/A		N/A		N/A		N/A
		10	HELA_pk20_sw3_215sc_mono	1		1		1		1
	SPECTRUM Search Parameters 2			PST Length = 4 to 6, In silico Tolerance = 15 ppm
		Sr. #	File Information	MW Tolerance = 250 Da		MW Tolerance = 500 Da		MW Tolerance = 1000 Da		MW Tolerance = 2000 Da
		1	HELA_pk13_sw1_66sc_mono	N/A		N/A		N/A		N/A
		2	HELA_pk17_sw1_140sc_mono	1		1		1		1
		3	HELA_pk18_sw1_160sc_mono	N/A		‡		‡		‡
		4	HELA_pk18_sw2_160sc_mono	1		1		1		1
		5	HELA_pk19_sw1_210sc_mono	N/A		N/A		‡		‡
		6	HELA_pk19_sw2_255sc_mono	N/A		N/A		N/A		N/A
		7	HELA_pk19_sw3.1_147sc_mono	N/A		N/A		N/A		N/A
		8	HELA_pk20_sw1_205sc_mono	N/A		N/A		N/A		N/A
		9	HELA_pk20_sw2_202sc_mono	N/A		N/A		N/A		N/A
		10	HELA_pk20_sw3_215sc_mono	1		1		1		1
	SPECTRUM Search Parameters 3			PST Length = 3 to 6, In silico Tolerance = 25 ppm
		Sr. #	File Information	MW Tolerance = 250 Da		MW Tolerance = 500 Da		MW Tolerance = 1000 Da		MW Tolerance = 2000 Da
		1	HELA_pk13_sw1_66sc_mono	1		1		1		1
		2	HELA_pk17_sw1_140sc_mono	1		1		1		1
		3	HELA_pk18_sw1_160sc_mono	1		1		1		1
		4	HELA_pk18_sw2_160sc_mono	1		1		1		1
		5	HELA_pk19_sw1_210sc_mono	1		1		1		1
		6	HELA_pk19_sw2_255sc_mono	‡		‡		‡		‡
		7	HELA_pk19_sw3.1_147sc_mono	1		1		1		1
		8	HELA_pk20_sw1_205sc_mono	N/A		N/A		N/A		N/A
		9	HELA_pk20_sw2_202sc_mono	N/A		N/A		N/A		N/A
		10	HELA_pk20_sw3_215sc_mono	1		1		1		1
	SPECTRUM Search Parameters 4			PST Length = 4 to 6, In silico Tolerance = 25 ppm
		Sr. #	File Information	MW Tolerance = 250 Da		MW Tolerance = 500 Da		MW Tolerance = 1000 Da		MW Tolerance = 2000 Da
		1	HELA_pk13_sw1_66sc_mono	N/A		N/A		N/A		N/A
		2	HELA_pk17_sw1_140sc_mono	1		1		1		1
		3	HELA_pk18_sw1_160sc_mono	N/A		‡		‡		‡
		4	HELA_pk18_sw2_160sc_mono	1		1		1		1
		5	HELA_pk19_sw1_210sc_mono	N/A		N/A		‡		‡
		6	HELA_pk19_sw2_255sc_mono	N/A		N/A		N/A		N/A
		7	HELA_pk19_sw3.1_147sc_mono	N/A		N/A		N/A		N/A
		8	HELA_pk20_sw1_205sc_mono	N/A		N/A		N/A		N/A
		9	HELA_pk20_sw2_202sc_mono	N/A		N/A		N/A		N/A
		10	HELA_pk20_sw3_215sc_mono	1		1		1		1
	N/A : Not applicable as no protein was found for these searches									PST : Peptide Sequence Tag
	‡ : True protein (P62805 - Histone H4) not found/ not reported as top-identification									MW : Molecular Weight
